# Supplementary material for: A prognostic model (BATAP) with external validation for patients with transplant-associated thrombotic microangiopathy
Source: PubMed Central journal article supplement — Blood Adv. 2021 Dec 16;5(24):5479–89. doi: 10.1182/bloodadvances.2021004530 (PMC8714708; doi:10.1182/bloodadvances.2021004530), 2021-12-16
Supplement: advancesADV2021004530-suppl1.pdf [file advancesADV2021004530-suppl1.pdf]

## Supplemental materials

**Supplemental Figure 1. Survival analysis according to renal involvement.** Kaplan-Meier estimations of overall survival for patients with and without renal dysfunction at the diagnosis of TA-TMA. Concomitant renal dysfunction was significantly associated with an adverse overall survival (log-rank  $P < 0.0001$ ).

**Supplemental Figure 2. Survival analysis according to the independent prognostic factors in the derivation cohort.** Kaplan-Meier estimations showed significantly different overall survival for patients with and without these prognostic factors (log rank  $P < 0.001$  for each).

**Supplemental Figure 3. ROC curve for the BATAP model.** ROC curves showed good discriminative performance in both the derivation (AUC = 0.807, 95% CI 0.756-0.859) (A) and the validation (AUC = 0.766, 95% CI 0.707-0.826) (B) cohorts.

**Supplemental Figure 4. Sensitivity analysis of the BATAP risk score revealing similar discriminative capacity in patients undergoing different transplant protocols.** Patients undergoing other protocols included 51 patients receiving HLA-matched related donor transplantation and 7 patients receiving HLA-matched unrelated donor transplantation. AuROC (95%CI): 0.785 (0.745-0.824) for the total cohort, 0.794 (0.753-0.835) for the ATG-based group, and 0.749 (0.646-0.853) for the group of other protocols.

**Supplemental Figure 5. Multivariate analysis exploring the prognostic effect of immunosuppressive modulations in the derivation cohort.** Multivariate logistic regression showed no significant differences in the 6-month overall survival rates among patients undergoing different immunosuppressive regimens after the TMA diagnosis. Subgroup analysis focusing on the BATAP intermediate/high-risk groups and the BATAP low-risk group also showed no significant differences. \*For each group, the reference group consisted of patients undergoing maintenance of CNIs or switch to other CNIs (n=124 (46.1%) in the total group; n=47 (41.4%) in the BATAP intermediate/high-risk group; and n=47 (56.6%) in the BATAP low-risk group). \*\*Adjusted by sex, age, aGVHD and BATAP risk group. #Adjusted by sex, age and aGVHD.

**Supplemental Figure 6. Fine-Gray model for nonrelapse mortality (NRM) in patients with different immunosuppressant modulations.** Patients undergoing withdrawal of CNIs showed adverse NRM (A, log-rank  $P = 0.016$ ). However, when stratified by the BATAP risk groups (B, the BATAP intermediate/high-risk groups, log-rank  $P = 0.476$ ; C, the BATAP low-risk group, log-rank  $P = 0.126$ ), subgroup analysis showed no significant differences.

Supplemental Table 1. Univariate analysis identifying the potential prognostic factors

Supplemental Table 2. The predicted and observed probabilities for 6-month mortality of TA-TMA

Supplemental Table 3. Characteristics and outcomes of the patients receiving different immunosuppressive regimens after TA-TMA

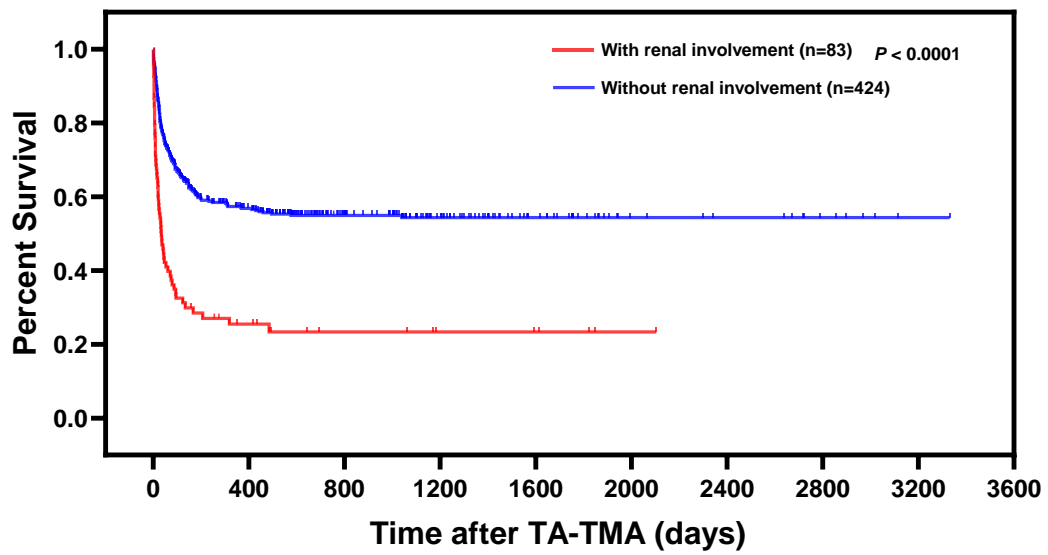

**Supplemental Figure 1. Survival analysis according to renal involvement.** Kaplan-Meier estimations of overall survival for patients with and without renal dysfunction at the diagnosis of TA-TMA. Concomitant renal dysfunction was significantly associated with an adverse overall survival (log-rank  $P < 0.0001$ ).

**A**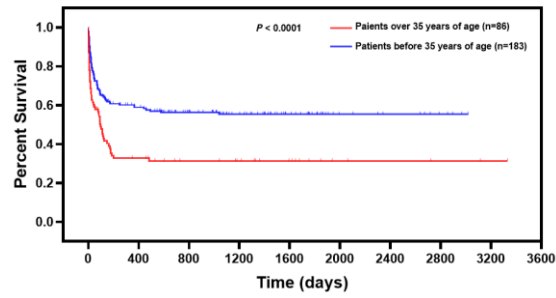**B**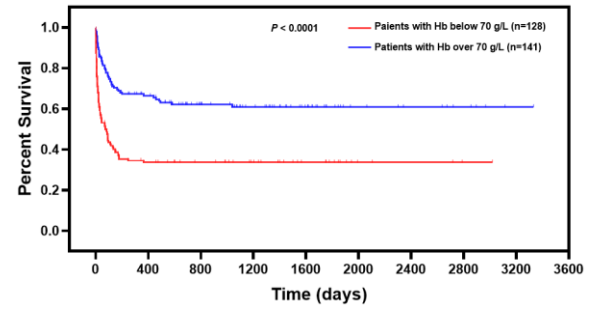**C**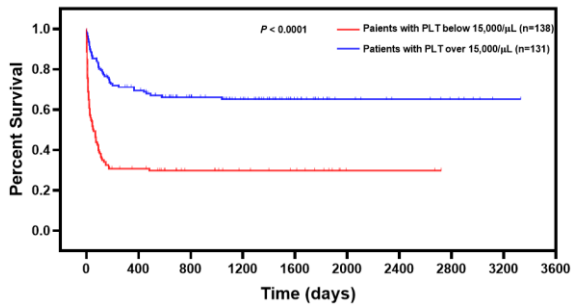**D**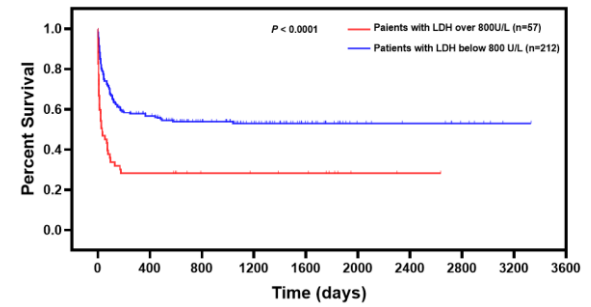**E**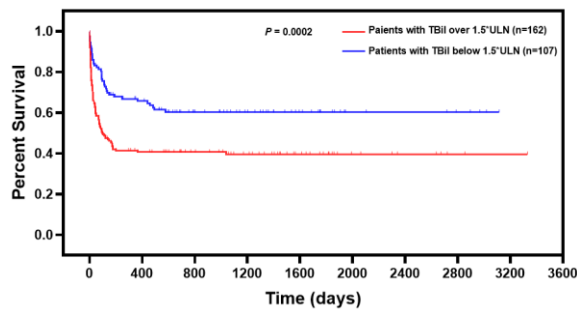

**Supplemental Figure 2. Survival analysis according to the independent prognostic factors in the derivation cohort.** Kaplan-Meier estimations showed significantly different overall survival for patients with and without these prognostic factors (log rank  $P < 0.001$  for each).

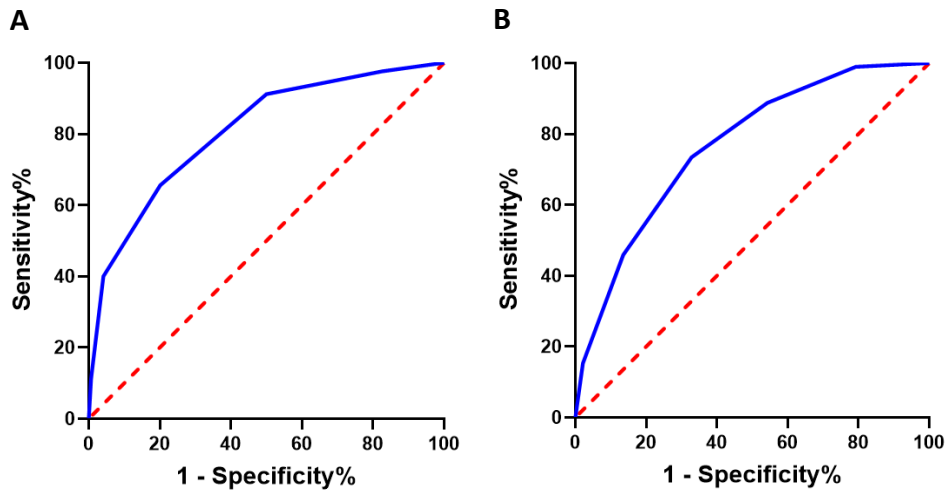

**Supplemental Figure 3. ROC curve for the BATAP model.** ROC curves showed good discriminative performance in both the derivation (AUC = 0.807, 95% CI 0.756-0.859) (A) and the validation (AUC = 0.766, 95% CI 0.707-0.826) (B) cohorts.

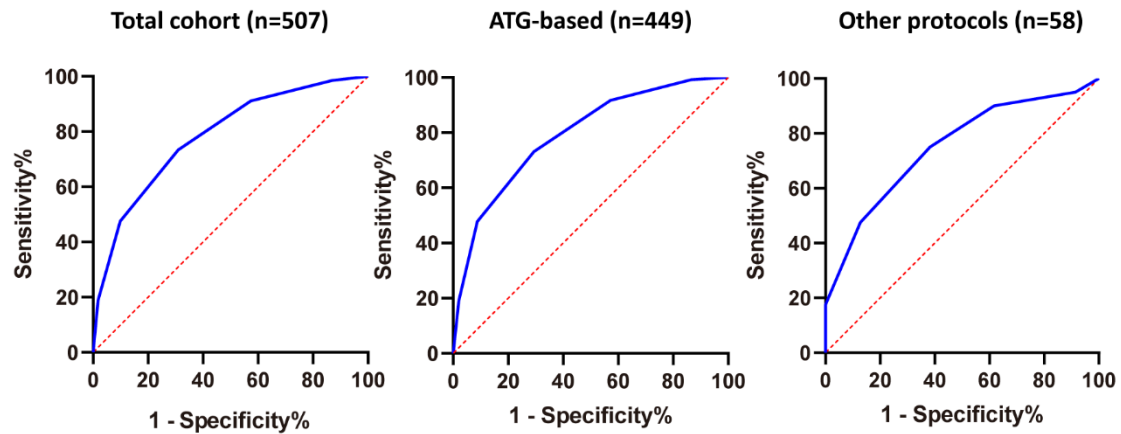

**Supplemental Figure 4. Sensitivity analysis of the BATAP risk score revealing similar discriminative capacity in patients undergoing different transplant protocols.** Patients undergoing other protocols included 51 patients receiving HLA-matched related donor transplantation and 7 patients receiving HLA-matched unrelated donor transplantation. AuROC (95%CI): 0.785 (0.745-0.824) for the total cohort, 0.794 (0.753-0.835) for the ATG-based group, and 0.749 (0.646-0.853) for the group of other protocols.

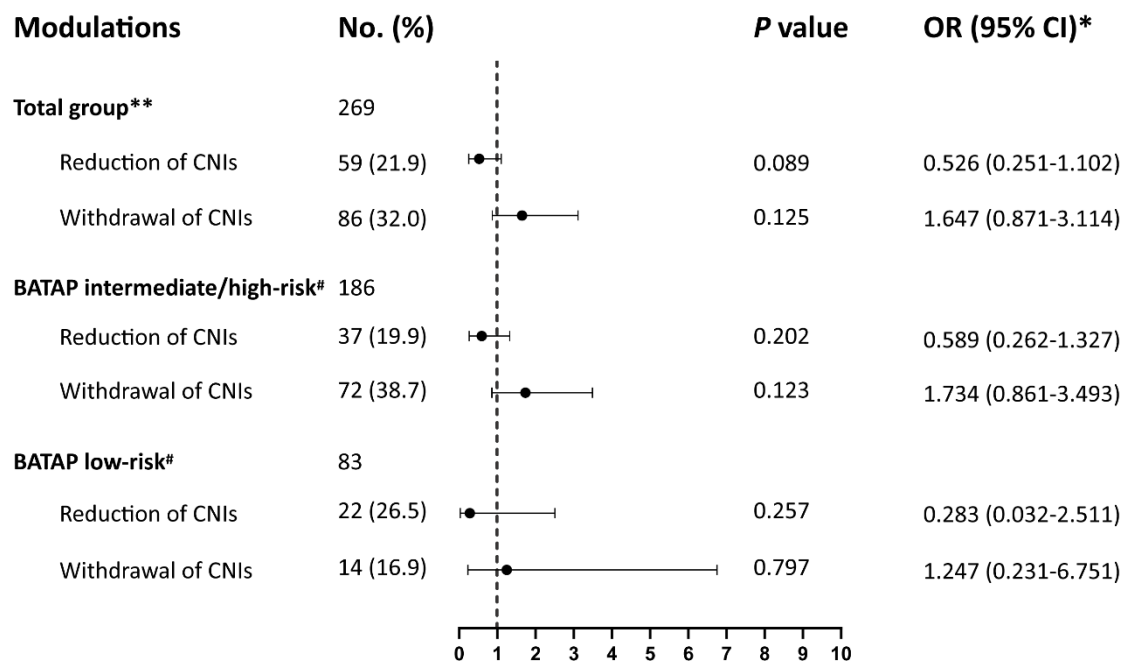

**Supplemental Figure 5. Multivariate analysis exploring the prognostic effect of immunosuppressive modulations in the derivation cohort.** Multivariate logistic regression showed no significant differences in the 6-month overall survival rates among patients undergoing different immunosuppressive regimens after the TMA diagnosis. Subgroup analysis focusing on the BATAP intermediate/high-risk groups and the BATAP low-risk group also showed no significant differences.

\*For each group, the reference group consisted of patients undergoing maintenance of CNIs or switch to other CNIs (n=124 (46.1%) in the total group; n=47 (41.4%) in the BATAP intermediate/high-risk group; and n=47 (56.6%) in the BATAP low-risk group).

\*\*Adjusted by sex, age, aGVHD and BATAP risk group.

#Adjusted by sex, age and aGVHD.

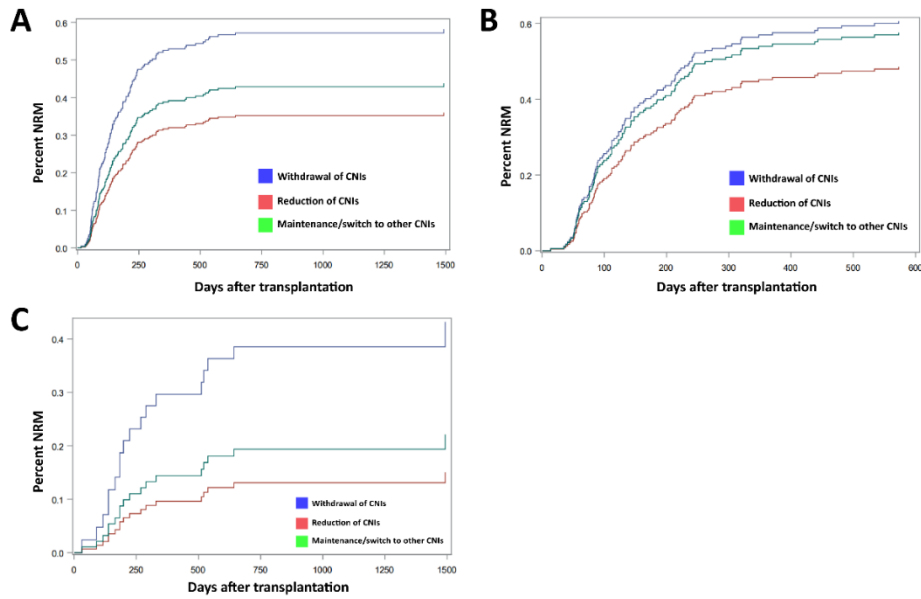

**Supplemental Figure 6. Fine-Gray model for nonrelapse mortality (NRM) in patients with different immunosuppressant modulations.** Patients undergoing withdrawal of CNIs showed adverse NRM (A, log-rank  $P = 0.016$ ). However, when stratified by the BATAP risk groups (B, the BATAP intermediate/high-risk groups, log-rank  $P = 0.476$ ; C, the BATAP low-risk group, log-rank  $P = 0.126$ ), subgroup analysis showed no significant differences.



Supplemental Table 1. Univariate analysis identifying the potential prognostic factors

| <b>Characteristics</b>                         | <b>OR (95% CI)</b>   | <b>P value*</b> |
|------------------------------------------------|----------------------|-----------------|
| Sex (Male vs. Female)                          |                      | 0.342           |
| Age at diagnosis ( $\geq 35$ vs. $< 35$ years) | 2.476 (1.463-4.190)  | 0.001           |
| HCT-CI                                         |                      |                 |
| 1-2 vs. 0                                      |                      | 0.390           |
| $\geq 3$ vs. 0                                 |                      | 0.388           |
| Underlying disease                             |                      |                 |
| AML (with vs. without)                         | 1.673 (1.011-2.769)  | 0.045           |
| ALL (with vs. without)                         |                      | 0.972           |
| CML (with vs. without)                         |                      | 0.506           |
| MDS/MPN (with vs. without)                     |                      | 0.148           |
| Others (with vs. without)                      |                      | 0.214           |
| Donor type                                     |                      |                 |
| Partially matched related vs. Matched related  |                      | 0.424           |
| Matched unrelated vs. Matched related          |                      | 0.767           |
| ABO mismatched vs. ABO matched                 |                      | 0.907           |
| Conditioning regimen                           |                      |                 |
| BU/CY (yes vs. no)                             |                      | 0.281           |
| BU/CY+ATG (yes vs. no)                         |                      | 0.995           |
| TBI-based regimen (yes vs. no)                 |                      | 0.403           |
| Other (yes vs. no)                             |                      | 0.403           |
| GVHD prophylaxis                               |                      |                 |
| Tacrolimus/sirolimus (yes vs. no)              |                      | 0.130           |
| Donor lymphocyte infusion (with vs. without)   |                      | 0.866           |
| Hb $< 70$ g/L                                  | 4.063 (2.443-6.758)  | $<0.0001$       |
| Platelet count $< 15,000/\mu\text{L}$          | 6.004 (3.540-10.182) | $<0.0001$       |
| TBIL $> 1.5*$ ULN                              | 2.947 (1.761-4.931)  | $<0.0001$       |
| Hypoalbuminemia (with vs. without)             | 2.122 (1.239-3.637)  | 0.006           |
| Proteinuria (with vs. without)                 | 3.133 (1.876-5.231)  | $<0.0001$       |

Supplemental Table 2. The predicted and observed probabilities for 6-month mortality of TA-TMA

| Risk score | Estimated risk | Observed frequency        |                           |
|------------|----------------|---------------------------|---------------------------|
|            |                | Derivation cohort (n=269) | Validation cohort (n=238) |
| 0          | 0.073509       | 0.107143 (3/28)           | 0.033333 (1/30)           |
| 1          | 0.153683       | 0.145455 (8/55)           | 0.222222 (10/45)          |
| 2          | 0.293592       | 0.426667 (32/75)          | 0.333333 (15/45)          |
| 3          | 0.487503       | 0.581818 (32/55)          | 0.5 (27/54)               |
| 4          | 0.685249       | 0.878049 (36/41)          | 0.652174 (30/46)          |
| 5          | 0.832855       | 0.9333333 (14/15)         | 0.8333333 (15/18)         |

Supplemental Table 3. Characteristics and outcomes of the patients receiving different immunosuppressive regimens after TA-TMA

| Characteristics                 | Management of CNIs |                  |                              | P value |
|---------------------------------|--------------------|------------------|------------------------------|---------|
|                                 | Withdrawal (n=86)  | Reduction (n=59) | Switch / Maintenance (n=124) |         |
| Sex, n (%)                      |                    |                  |                              | NS      |
| Male                            | 49 (57.0)          | 36 (61.0)        | 76 (61.3)                    |         |
| Female                          | 37 (43.0)          | 23 (39.0)        | 48 (38.7)                    |         |
| Age at HSCT (years)             |                    |                  |                              | NS      |
| Median [range]                  | 23.5 [8-62]        | 25 [3-56]        | 28.5 [4-59]                  |         |
| Donor type, n (%)               |                    |                  |                              | NS      |
| Matched related                 | 11 (12.8)          | 6 (10.2)         | 11 (8.9)                     |         |
| HLA-partially matched related   | 74 (86.0)          | 53 (89.8)        | 112 (90.3)                   |         |
| Matched unrelated               | 1 (1.2)            | 0                | 1 (0.8)                      |         |
| HCT-CI, n (%)                   |                    |                  |                              | NS      |
| 0                               | 63 (73.3)          | 45 (76.3)        | 88 (71.0)                    |         |
| 1-2                             | 21 (24.4)          | 14 (23.7)        | 31 (25.0)                    |         |
| ≥ 3                             | 2 (2.3)            | 0                | 5 (4.0)                      |         |
| Age at TA-TMA diagnosis (years) |                    |                  |                              | NS      |
| Median [range]                  | 24 [8-62]          | 25 [3-56]        | 28.5 [4-59]                  |         |
| Immunosuppression prior to TMA  |                    |                  |                              | NS      |
| CsA-based                       | 59 (68.6)          | 44 (74.6)        | 98 (79.0)                    |         |
| Tacrolimus/sirolimus            | 27 (31.4)          | 15 (25.4)        | 26 (21.0)                    |         |
| BATAP risk group, n (%)         |                    |                  |                              | 0.001   |
| Low-risk (<2 pts)               | 14 (16.3)          | 22 (37.3)        | 47 (37.9)                    |         |
| Intermediate/high-risk (≥2 pts) | 72 (83.7)          | 37 (62.7)        | 77 (62.1)                    |         |
| aGVHD, n (%)                    |                    |                  |                              |         |
| None                            | 20 (23.2)          | 18 (30.5)        | 34 (27.4)                    | 0.343   |
| I-II                            | 40 (46.5)          | 30 (50.8)        | 65 (52.4)                    | 0.697   |
| III-IV                          | 26 (30.2)          | 11 (18.6)        | 25 (20.2)                    | 0.155   |
| Infection at TMA onset, n (%)   |                    |                  |                              |         |
| Bacteremia                      | 6 (7.0)            | 4 (6.8)          | 10 (8.1)                     | 0.935   |
| Viremia                         | 21 (24.4)          | 15 (25.4)        | 28 (22.6)                    | 0.902   |

|                                     |               |               |                |        |
|-------------------------------------|---------------|---------------|----------------|--------|
| Fungal                              | 4 (4.7)       | 3 (5.1)       | 7 (5.6)        | 0.949  |
| Infection within 6-mo of TMA, n (%) |               |               |                |        |
| Bacteremia                          | 9 (10.5)      | 5 (8.5)       | 13 (10.5)      | 0.903  |
| Viremia                             | 14 (16.3)     | 11 (18.6)     | 26 (21.0)      | 0.694  |
| Fungal                              | 9 (10.7)      | 7 (11.9)      | 14 (11.3)      | 0.964  |
| Relapse, n (%)                      | 8 (9.3)       | 2 (3.4)       | 11 (8.9)       | 0.357  |
| 6-mo overall survival               | 37.2% (32/86) | 69.5% (41/59) | 57.3% (71/124) | <0.001 |
| Overall survival                    | 33.7% (29/86) | 64.4% (38/59) | 51.6% (64/124) | 0.001  |
| Nonrelapse mortality                | 58.1% (50/86) | 35.6% (21/59) | 41.1% (51/124) | 0.012  |

Abbreviations: TA-TMA, transplant-associated thrombotic microangiopathy; HSCT, hematopoietic stem cell transplantation; HLA, human leukocyte antigen; BU, busulfan; CY, cyclophosphamide; TBI, total body irradiation; GVHD, graft-versus-host disease; CsA, cyclosporine
